# Supplementary material for: Distinct brain responses to different inhibitions: Evidence from a modified Flanker Task
Source: PubMed Central journal article supplement (PMC5532368; doi:10.1038/s41598-017-04907-y), 2017-07-27
Supplement: 41598_2017_4907_MOESM1_ESM.pdf [file 41598_2017_4907_MOESM1_ESM.pdf]

# **Distinct brain responses to different inhibitions: Evidence from a modified Flanker Task**

Liufang Xie, Maofan Ren, Bihua Cao, Fuhong Li \*

School of Psychology, Jiangxi Normal University, Nanchang, 330022, China

\*Corresponding author:

Fuhong Li, E-mail address: [lifuhong@jxnu.edu.cn](mailto:lifuhong@jxnu.edu.cn) (F. Li)

Tel: +86-0791-88121252

School of Psychology, Jiangxi Normal University, Nanchang, 330022, China

## Supplementary information

**Table S1 - Values of the averaged amplitude of each component in different conditions**

| Window<br>(ms) | Component     | Flanker<br>Inhibition ( $\mu\text{v}$ ) | Rule<br>Inhibition ( $\mu\text{v}$ ) | Response<br>Inhibition ( $\mu\text{v}$ ) | Non-<br>inhibition ( $\mu\text{v}$ ) |
|----------------|---------------|-----------------------------------------|--------------------------------------|------------------------------------------|--------------------------------------|
| 150-200        | Posterior N1  | -2.27                                   | -2.63                                | -1.96                                    | -2.05                                |
|                | Frontal P2    | 1.92                                    | 3.00                                 | 2.51                                     | 2.11                                 |
| 270-350        | Frontal N2    | -0.94                                   | 2.31                                 | 0.09                                     | 0.18                                 |
| 350-450        | Frontal P3a   | 0.60                                    | 4.05                                 | 1.86                                     | 2.47                                 |
|                | Posterior P3b | 2.45                                    | 2.57                                 | 3.62                                     | 3.00                                 |
